# Supplementary material for: Constructing compatible interface between Li7La3Zr2O12 solid electrolyte and LiCoO2 cathode for stable cycling performances at 4.5 V
Source: Royal Society of Chemistry journal article supplement (doi:10.1039/d1nr01079d), 2021-01-01
Supplement: d1nr01079d1.pdf [file d1nr01079d1.pdf]

## *Supporting Information*

### **Constructing compatible interface between $\text{Li}_7\text{La}_3\text{Zr}_2\text{O}_{12}$ solid electrolyte and $\text{LiCoO}_2$ cathode for stable cycling performances at 4.5 V**

*Yuwan Dong,<sup>a</sup> Panzhe Su,<sup>a</sup> Guanjie He,<sup>b</sup> Huiling Zhao<sup>\*a</sup> and Ying Bai<sup>\*a</sup>*

*<sup>a</sup> International Joint Research Laboratory of New Energy Materials and Devices of  
Henan Province, School of Physics & Electronics, Henan University, Kaifeng, 475004, P.  
R. China*

*<sup>b</sup> Materials Research Centre, UCL Department of Chemistry, Christopher Ingold  
Building, 20 Gordon Street, London, WC1H 0AJ, UK*

**\* Corresponding author.**

*E-mail: zhao@henu.edu.cn (H. Zhao); ybai@henu.edu.cn (Y. Bai)*

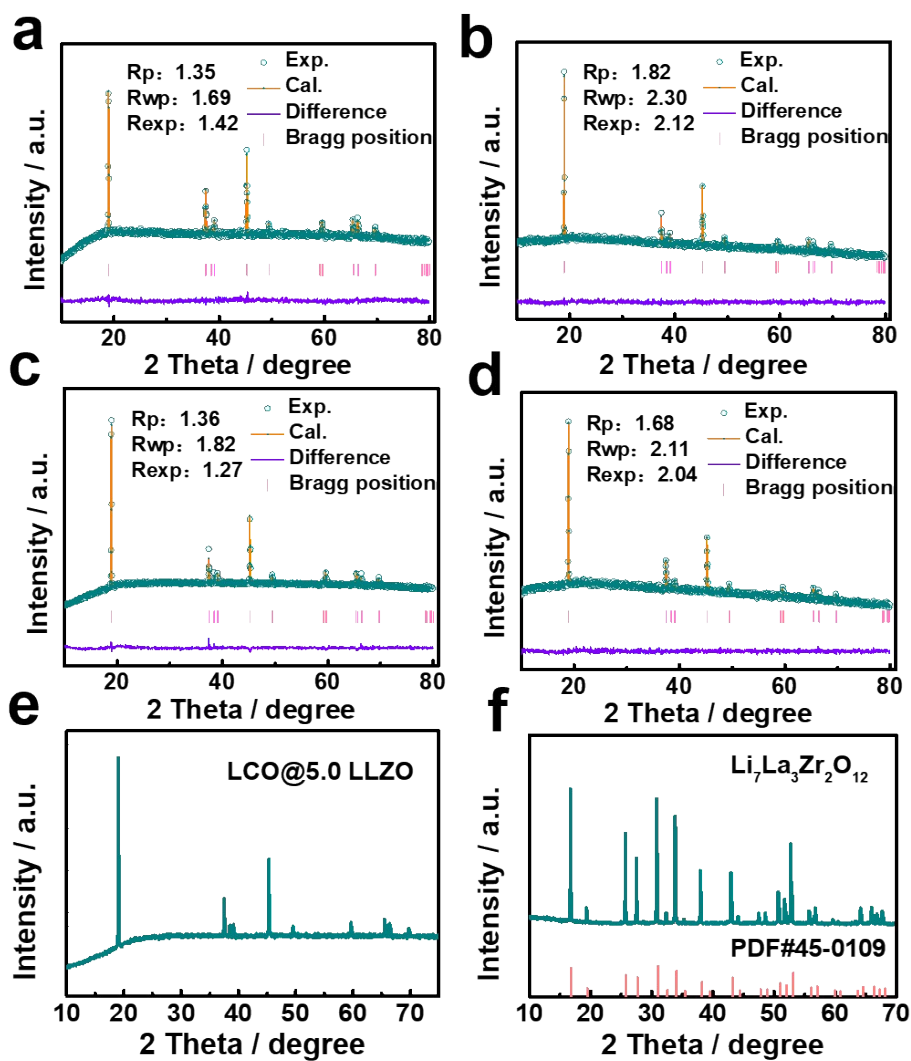

Fig. S1. (a-d) Rietveld refinement XRD spectra for the pristine LCO and LCO@LLZO samples. (e, f) XRD patterns of the LCO@5.0 LLZO and pure phase LLZO samples.

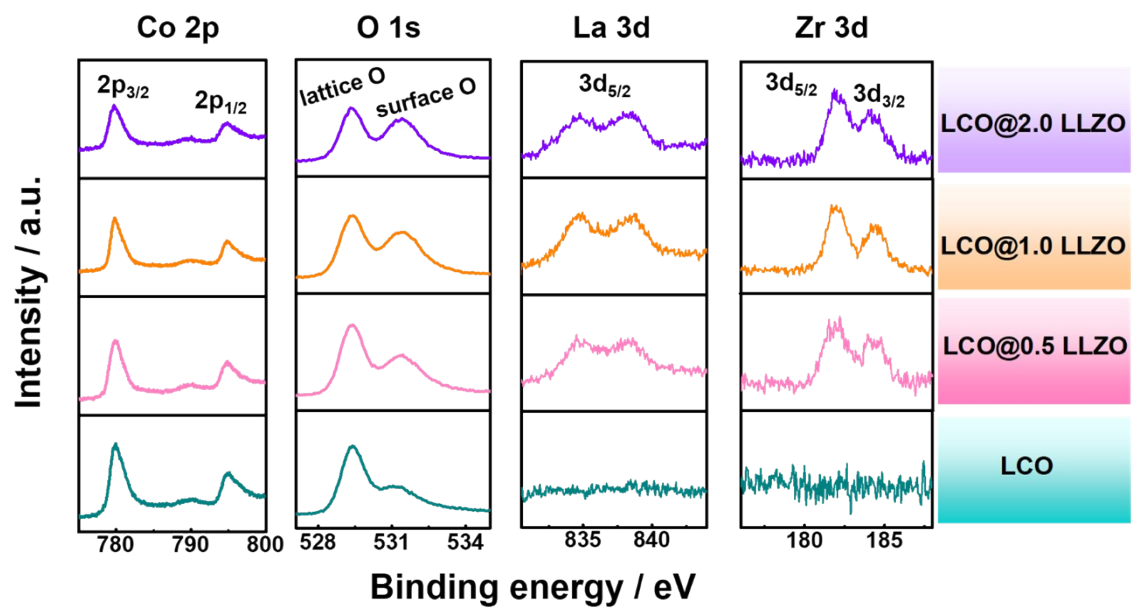

Fig. S2. XPS spectra of Co 2p, O 1s, La 3d and Zr 3d for the pristine and LCO@LLZO samples.

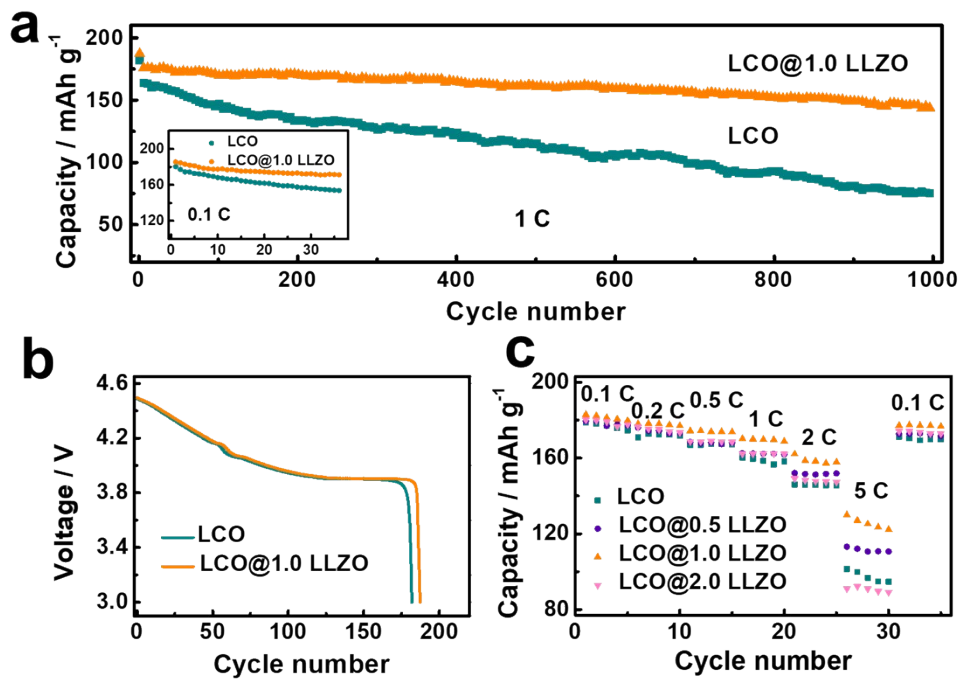

**Fig. S3.** (a) The long-term cycling performances under 1 C (inset with 0.1 C) and (b) initial discharge curves of the pristine and LCO@1.0 LLZO at high current rate of 1 C (1 C = 274 mA g<sup>-1</sup>). (c) The rate performances of the pristine LCO and LLZO modified electrodes under different current rates.

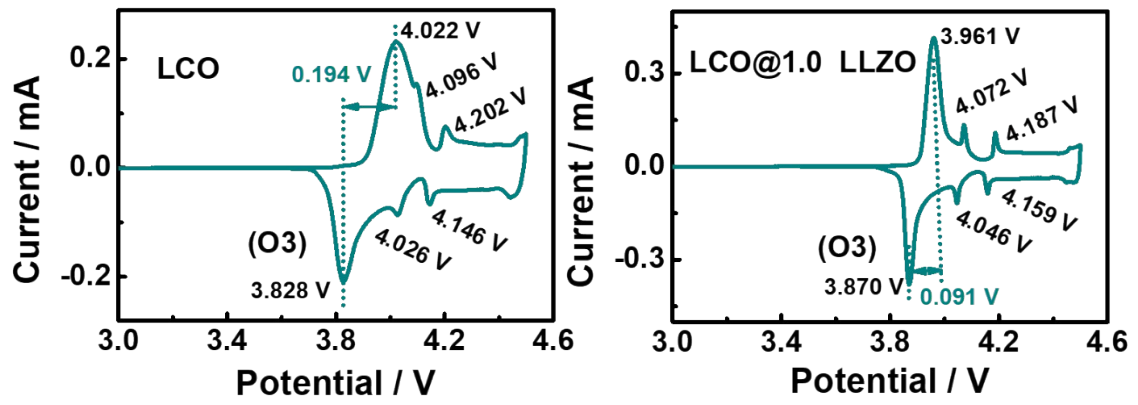

Fig. S4. CV curves of LCO and LCO@1.0 LLZO electrodes at a scan rate of  $0.05 \text{ mV s}^{-1}$  in the voltage range of 3.0 ~ 4.5 V.

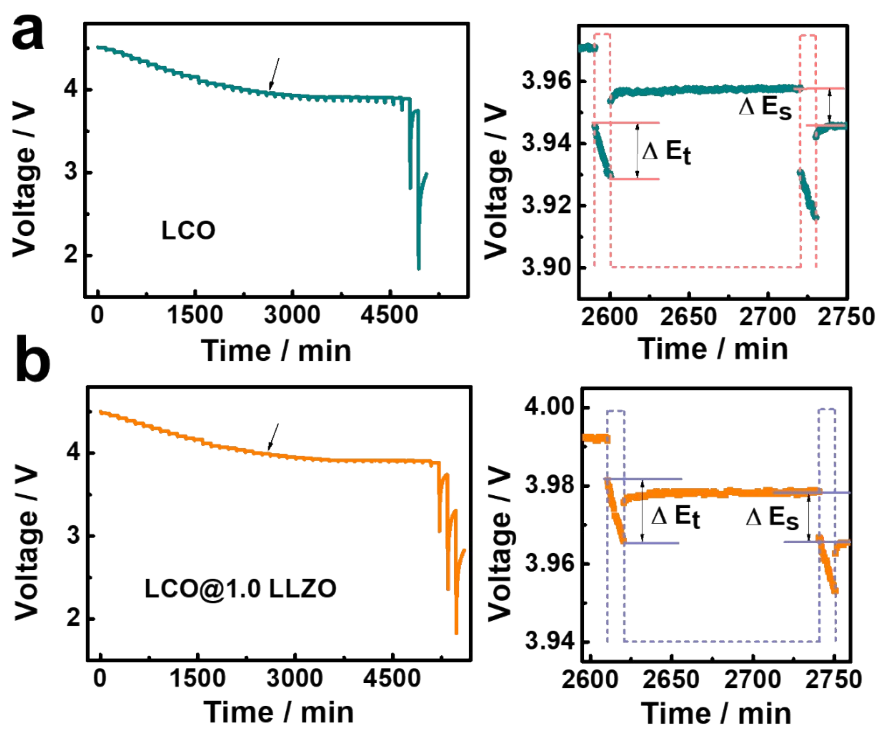

Fig. S5. GITT measurements for the Li/LCO cell (a) and LCO@1.0 LLZO cell (b) in the first cycle at high working-voltage of 4.5 V, and the corresponding zoomed curves marked by the arrows.

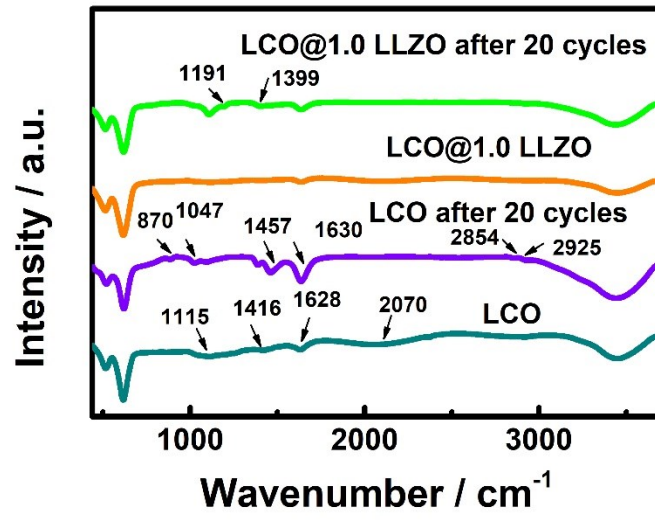

**Fig. S6.** FTIR spectra of the pristine and LCO@1.0 LLZO samples before and after cycling in the operating voltage of 3.0 ~ 4.5 V at room temperature.

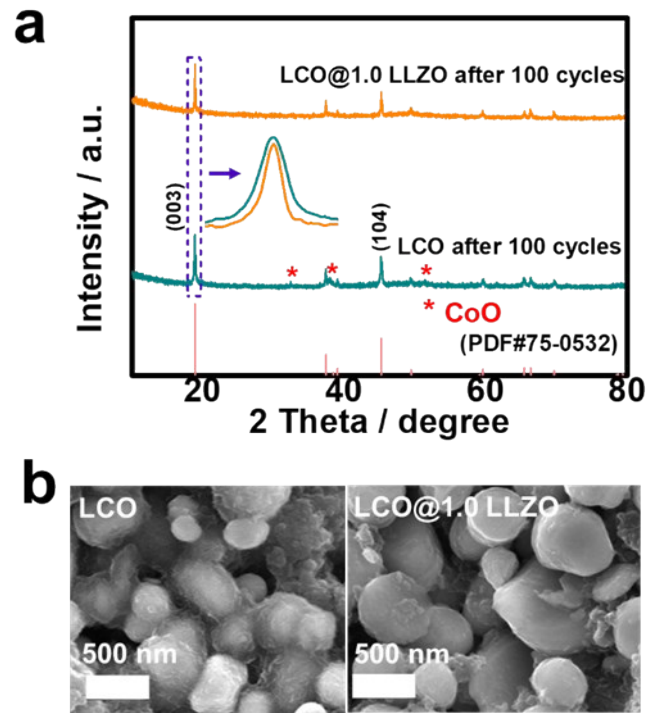

**Fig. S7.** XRD patterns (a) and SEM images (b) of the pristine and the LCO@1.0 LLZO electrodes after 100 cycles in the working voltage range of 3.0 ~ 4.5 V at the elevated temperature of 55 °C.



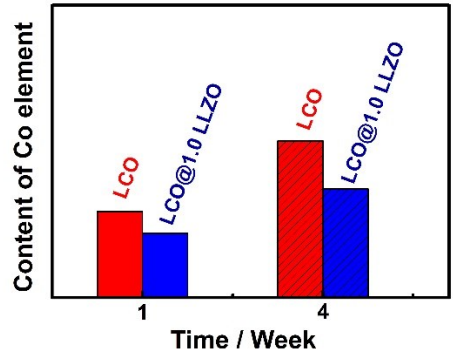

Fig. S8. The Co content histogram of the pristine and LCO@1.0 LLZO soaked electrolytes after 1 and 4 weeks.

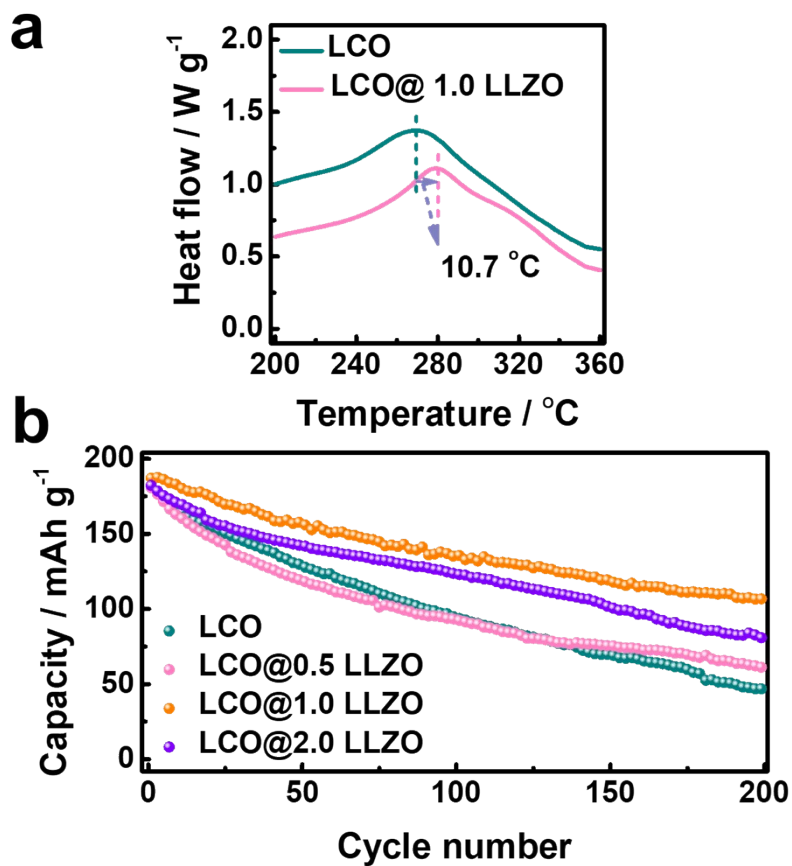

**Fig. S9.** (a) DSC profiles of the pristine and LCO@1.0 LLZO samples after 30 cycles (at the high fully charging-state of 4.5 V). (b) Cycle performances of all the as-prepared samples at the current density of 0.1 C and the elevated temperature of 55  $^{\circ}C$ .

**Table S1.** Refinement parameters for the XRD spectra of all as-prepared samples.

| Sample       | $a$ (Å) | $c$ (Å) | $c/a$ | $I(003)/I(104)$ |
|--------------|---------|---------|-------|-----------------|
| LCO          | 2.816   | 14.054  | 4.99  | 1.386           |
| LCO@0.5 LLZO | 2.816   | 14.054  | 4.99  | 1.758           |
| LCO@1.0 LLZO | 2.816   | 14.055  | 4.99  | 1.862           |
| LCO@2.0 LLZO | 2.816   | 14.054  | 4.99  | 1.895           |

**Table S2.** Comparison of the capacity retentions of surface-modified LCO electrodes at the high cutoff voltage of 4.5 V.

| Material                                  | Current density | Capacity retention    | Ref. |
|-------------------------------------------|-----------------|-----------------------|------|
| LCO@ZrO <sub>x</sub> F <sub>y</sub>       | 1 C             | 200 cycles-56.4 %     | 1    |
| LCO@MgF                                   | 0.2 C           | 50 cycles- over 80 %  | 2    |
| LCO@Al <sub>2</sub> O <sub>3</sub>        | 1 C             | 1000 cycles- 72.5 %   | 3    |
| LCO@ZrO <sub>2</sub>                      | 0.5 C           | 30 cycles- 85 %       | 4    |
| LCO@LATP                                  | 1 C             | 700 cycles- over 60 % | 5    |
| LCO@LaF <sub>3</sub>                      | 0.1 C           | 50 cycles- 90.9 %     | 6    |
| LCO@Al <sub>2</sub> O <sub>3</sub>        | 0.1 C           | 50 cycles- 91.8 %     | 7    |
| LCO@MgAl <sub>2</sub> O <sub>4</sub>      | 0.5 C           | 70 cycles- 96.8 %     | 8    |
| LCO@Al <sub>2</sub> O <sub>3</sub>        | 1/9 C           | 50 cycles- 88.4 %     | 9    |
| Al <sub>2</sub> O <sub>3</sub> ALD on LCO | 0.2 C           | 50 cycles- 79.8 %     | 10   |
| This work                                 | 1 C             | 1000 cycles- 76.8 %   |      |

**Table S3.** EIS fitting values of the pristine and LCO@1.0 LLZO electrodes.

| Resistance            | electrode    | 1st   | 10th  | 30th   |
|-----------------------|--------------|-------|-------|--------|
| $R_{sf}$ ( $\Omega$ ) | LCO          | 174.9 | 280.2 | 469.6  |
|                       | LCO@1.0 LLZO | 197.8 | 284.5 | 481.8  |
| $R_{ct}$ ( $\Omega$ ) | LCO          | 261.1 | 634.1 | 2135.0 |
|                       | LCO@1.0 LLZO | 182.9 | 325.5 | 549.3  |

**Table S4.** New peaks appeared and their corresponding identifications in the FTIR spectra of the pristine and LCO@1.0 LLZO electrodes after 20 cycles.

| Peak position (cm <sup>-1</sup> ) | Assignment                                                                                                  |
|-----------------------------------|-------------------------------------------------------------------------------------------------------------|
| 870, 1416                         | CO <sub>3</sub> <sup>2-</sup> bend, Li <sub>2</sub> CO <sub>3</sub> <sup>11</sup>                           |
| 1047, 1115                        | C-O st, ROCO <sub>2</sub> Li <sup>12</sup>                                                                  |
| 1191                              | R-F <sup>13</sup>                                                                                           |
| 1399, 1457                        | C-O st, Li <sub>2</sub> CO <sub>3</sub> <sup>12</sup>                                                       |
| 1628, 1630                        | C=O asym st, RCOOLi <sup>12</sup>                                                                           |
| 2070                              | CH <sub>2</sub> bend, ROCO <sub>2</sub> Li/(CH <sub>2</sub> OCO <sub>2</sub> Li) <sub>2</sub> <sup>14</sup> |
| 2854, 2925                        | C-H, ROCO <sub>2</sub> Li <sup>15,16</sup>                                                                  |

**Table S5.** The Co element concentrations of the pristine and LCO@1.0 LLZO samples immersed in the electrolytes with different soakage time.

| Sample                | Week 1                      | Week 4                      |
|-----------------------|-----------------------------|-----------------------------|
| LCO                   | 294.79 $\mu\text{g L}^{-1}$ | 535.72 $\mu\text{g L}^{-1}$ |
| LCO@1.0 LLZO at 4.5 V | 220.26 $\mu\text{g L}^{-1}$ | 371.33 $\mu\text{g L}^{-1}$ |

## Supplementary References

1. Z. Wang, Z. Wang, H. Guo, W. Peng, X. Li, J. Wang, *Mater. Lett.*, 2014, **123**, 93–96.
2. Y. Bai, K. Jiang, S. Sun, Q. Wu, X. Lu, N. Wan, *Electrochim. Acta*, 2014, **134**, 347-354.
3. A. Zhou, Q. Liu, Y. Wang, W. Wang, X. Yao, W. Hu, L. Zhang, X. Yu, J. Li, H. Li, *J. Mater. Chem. A*, 2017, **5**, 24361-24370.
4. B. J. Hwanga, C. Y. Chena, M. Y. Chenga, R. Santhanama, K. Ragavendrana, *J. Power Sources*, 2010, **195**, 4255–4265.
5. J. H. Shim, J. M. Han, J. H. Lee, S. Lee, *ACS Appl. Mater. Interfaces*, 2016, **8**, 12205–12210.
6. Z. Yanga, Q. Qiaoa, W. Yang, *Electrochim. Acta*, 2011, **56**, 4791–4796.
7. W. Zhang, Z. Chi, W. Mao, R. Lv, A. Cao, and L. Wan, *Angew. Chem. Int. Ed.*, 2014, **53**, 12776–12780.
8. D. D. Liang, H. F. Xiang, X. Liang, S. Cheng and C. H. Chen, *RSC Adv.*, 2017, **7**, 6809.
9. B. Han, T. Paulauskas, B. Key, C. Peebles, J. S. Park, R. F. Klie, T. Vaughey, and F. Dogan, *ACS Appl. Mater. Interfaces*, 2017, **9**, 14769–14778.
10. H. M. Cheng, F. M. Wang, J. P. Chu, R. Santhanam, J. Rick, and S. C. Lo, *J. Phys. Chem. C*, 2012, **116**, 7629–7637.
11. A. A. Shaltout, M. A. Allam and M. A. Moharram, *Spectrochim. Acta A*, 2011, **83**, 56-60.
12. K. I. Morigaki and A. Ohta, *J. Power Sources*, 1998, **76**, 159-166.
13. D. Ostrovskii, F. Ronci, B. Scrosati and P. Jacobsson, *J. Power Sources*, 2001, **103**, 10-17.
14. M. M. Mady and M. A. Allam, *Phys. Medica*, 2012, **28**, 48-53.
15. E. Markevich, G. Salitra, F. Chesneau, M. Schmidt and D. Aurbach, *ACS Energy Lett.*, 2017, **2**, 1321-1326.
16. M. Si, D. Wang, R. Zhao, D. Pan, C. Zhang, C. Yu, X. Lu, H. Zhao and Y. Bai, *Adv. Sci.*, 2019, **7**, 1902538.
